# Supplementary material
Source: PubMed Central journal article supplement (PMC3266785)
Supplement: JCI58815sd.pdf [file JCI58815sd.pdf]

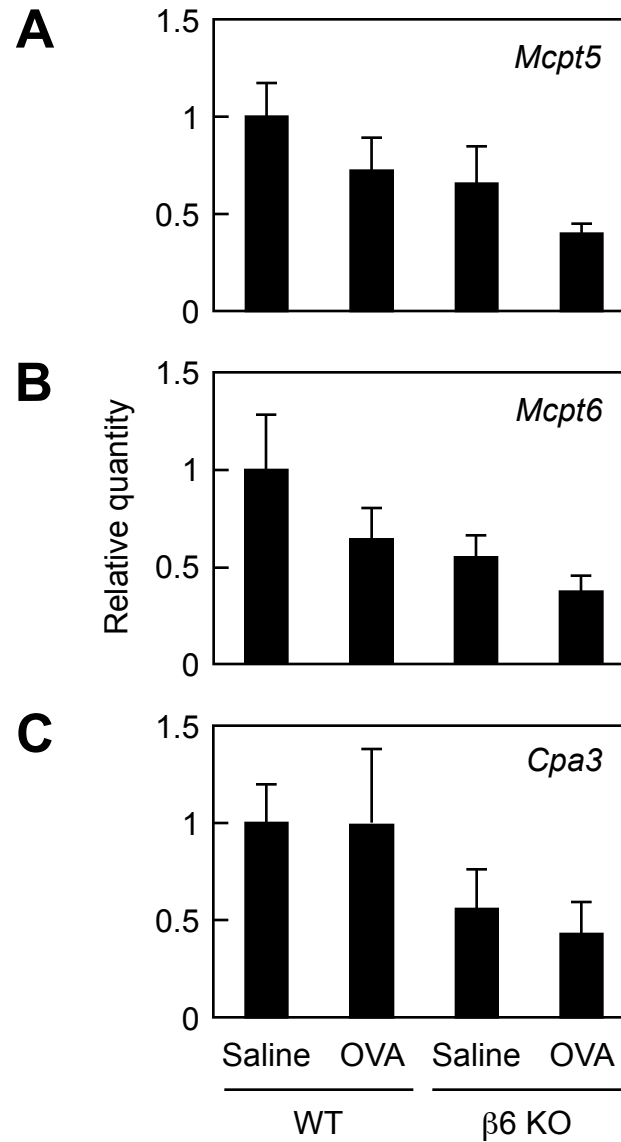

**Supplementary Figure 1** Expression profiles of mast cell protease transcripts in whole lung from chronically OVA challenged WT or  $\beta 6$  KO mice. Total RNA isolated from whole lung from WT or  $\beta 6$  KO mice was analyzed for (A) *Mcpt5*, (B) *Mcpt6* and (C) *Cpa3* expression by qRT-PCR. Values for each mRNA were normalized to GAPDH and relative quantity was calculated relative to expression in saline treated WT mice. Data are mean  $\pm$  SEM for 3 independent samples.

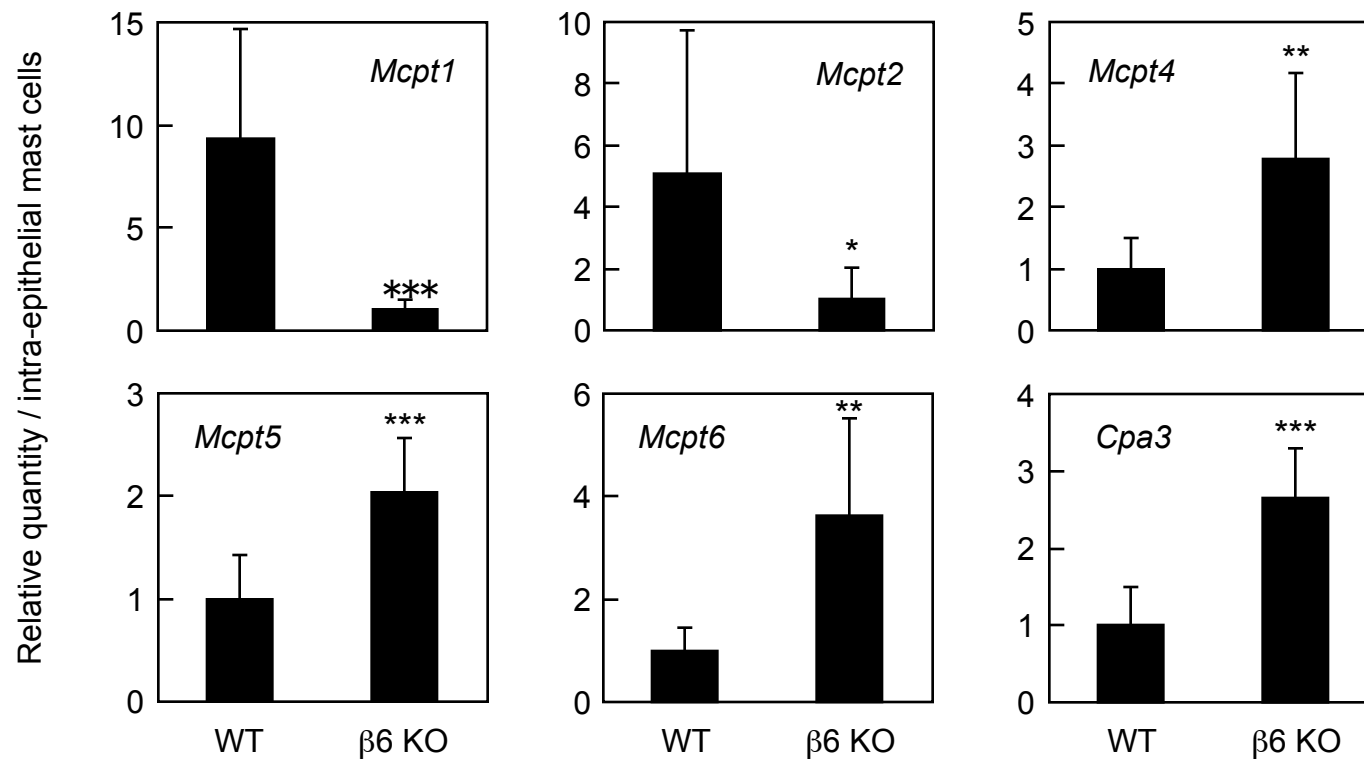

**Supplementary Figure 2** Expression profiles of mast cell protease transcripts in brushing samples from untreated wt and β6 KO mice after normalization to number of intra-epithelial mast cells. Values for each mRNA were normalized to GAPDH. The relative quantity for *Mcpt1* and 2 was calculated relative to expression in β6 KO samples and for *Mcpt4*, 5, 6 and *Cpa3* was calculated relative to expression in WT samples. Data are mean ± SEM for 8 independent samples. \* $P < 0.05$ , \*\* $P < 0.01$ , \*\*\* $P < 0.001$  compared with untreated WT mice

**A**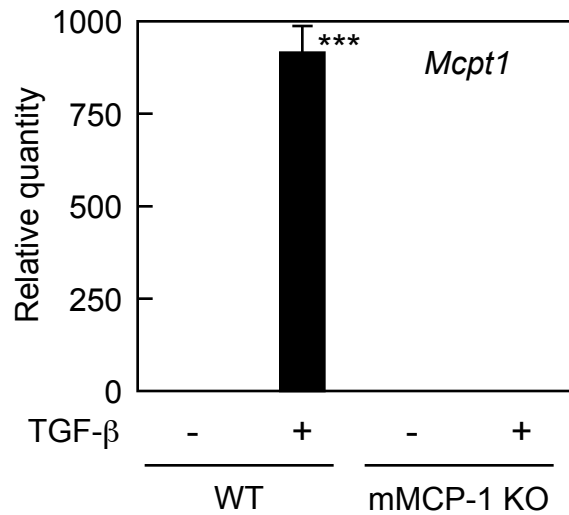**B**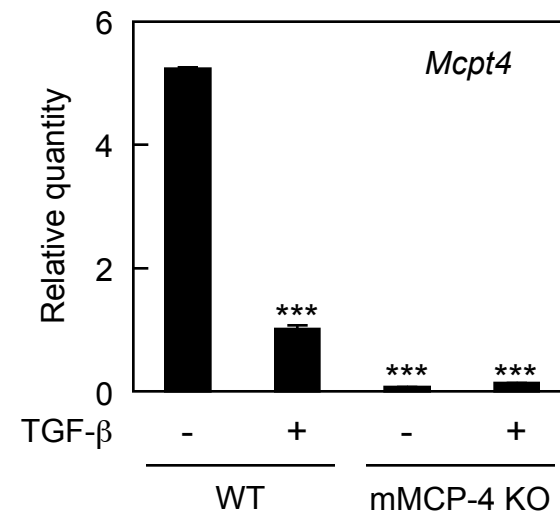

**Supplementary Figure 3** mMCP-1 KO and mMCP-4 KO mice have complete deletion of mMCP-1 and mMCP-4 expression in BMCMCs. *In vitro* differentiated BMCMCs from (A) mMCP-1 KO mice or (B) mMCP-4 KO mice were analyzed for *Mcpt1* and *Mcpt4* expression by qRT-PCR. Values for each mRNA were normalized to GAPDH. The relative quantity for *Mcpt1* was calculated relative to expression in TGF- $\beta$  (-) samples and for *Mcpt4* was calculated relative to expression in TGF- $\beta$  (+) samples. Data are mean  $\pm$  SEM for 3 independent samples. \*\*\* $P$  < 0.001 compared with WT TGF- $\beta$  (-).

**A**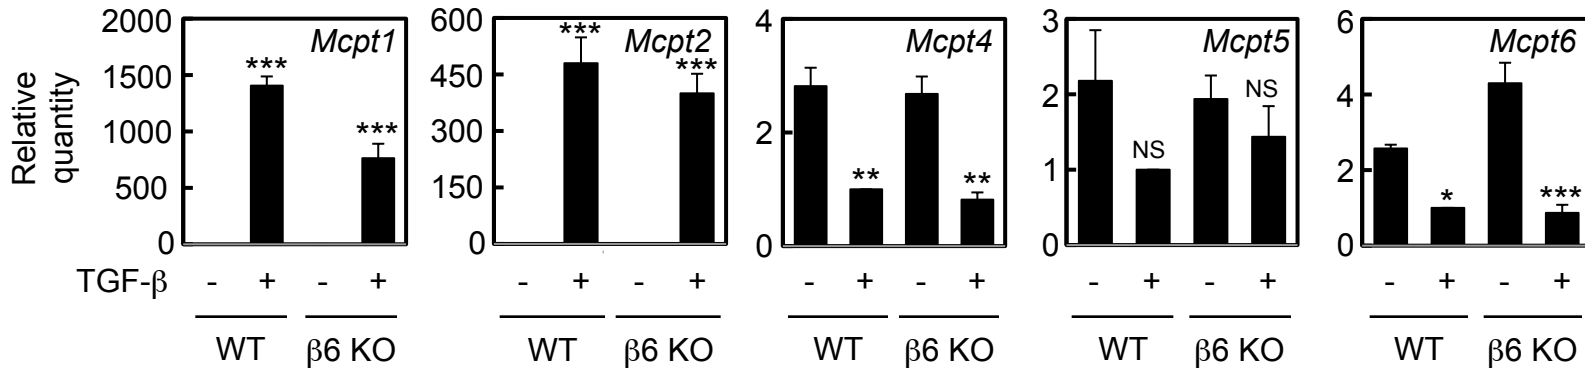**B**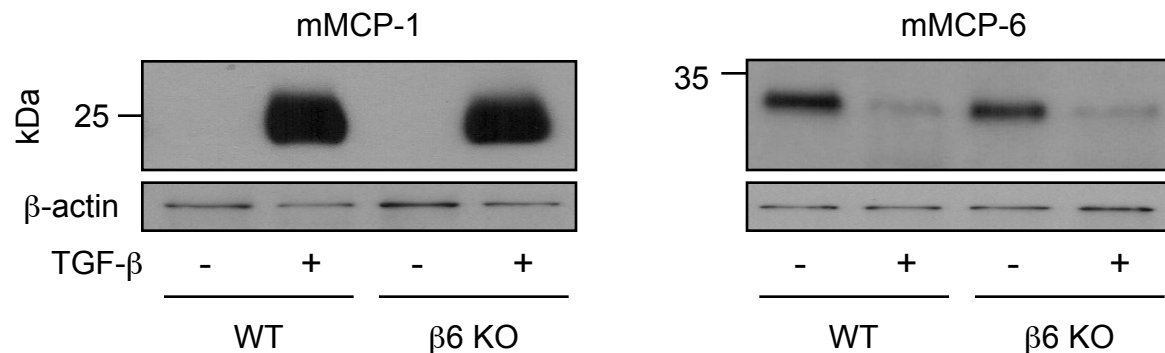

**Supplementary Figure 4** BMCMCs from WT and  $\beta 6$  KO mice respond similarly to stimulation with TGF- $\beta$ . (A) Expression profiles of mast cell protease transcripts by qRT-PCR from WT and  $\beta 6$  KO mice differentiated in the presence or absence of TGF- $\beta$  for 3 weeks. mRNA concentrations were normalized to GAPDH. The relative quantity for *Mcpt1* and *2* was calculated relative to expression in WT TGF- $\beta$  (-) samples and for *Mcpt4*, *5* and *6* was calculated relative to expression in WT TGF- $\beta$  (+) samples. Data are mean  $\pm$  SEM for 3 independent samples. \* $P$  < 0.05, \*\* $P$  < 0.01, \*\*\* $P$  < 0.001 compared with TGF- $\beta$  untreated samples. (B) Western blot analysis of mast cell proteases in 2  $\mu$ g of protein from cell lysates of cultured BMCMCs from WT and  $\beta 6$  KO mice differentiated in the presence or absence of TGF- $\beta$ .  $\beta$ -actin was used as a control for equal protein loading.

Supplementary Table 1 Genes most increased at baseline in  $\beta 6$  knockout epithelium

| Agilent probe ID | Symbol                | Description                                             | Fold increase* |
|------------------|-----------------------|---------------------------------------------------------|----------------|
| A_51_P514035     | <i>Cma1 (Mcpt5)</i>   | Mast cell chymase 1 (Mast cell protease 5)              | 14.3           |
| A_51_P514029     | <i>Cma1 (Mcpt5)</i>   | Mast cell chymase 1 (Mast cell protease 5)              | 13.1           |
| A_51_P145130     | <i>Mcpt4</i>          | Mast cell protease 4                                    | 13.0           |
| A_51_P214127     | <i>Cpa3</i>           | Carboxypeptidase A3, mast cell                          | 12.6           |
| A_52_P254155     | <i>Mcpt6 (Tpsb2)</i>  | Mast cell protease 6                                    | 11.0           |
| A_51_P145132     | <i>Mcpt4</i>          | Mast cell protease 4                                    | 8.6            |
| A_52_P8459       | <i>Tpsab1 (Mcpt7)</i> | Tryptase $\alpha/\beta 1$ (Mast cell protease 7)        | 8.2            |
| A_52_P484194     | <i>Il1rl1</i>         | Interleukin 1 receptor-like 1 (Interleukin 33 receptor) | 7.2            |
| A_51_P258721     | <i>Tpsg1</i>          | Tryptase $\gamma 1$                                     | 6.3            |
| A_51_P429770     | <i>Fcer1a</i>         | Fc receptor, IgE, high affinity I, $\alpha$ polypeptide | 5.3            |

\* Values represent fold increase with significant (adjusted  $P < 0.01$ ) changes in epithelium of  $\beta 6$  KO mice compared to WT mice.

Supplementary Table 2 Genes most induced by OVA in WT mice

| Agilent probe ID | Symbol             | Description                          | Fold increase |          | Adjusted <i>p</i><br>WT OVA<br>vs.<br>β6 KO OVA |
|------------------|--------------------|--------------------------------------|---------------|----------|-------------------------------------------------|
|                  |                    |                                      | WT *          | β6 KO ** |                                                 |
| A_51_P335460     | <i>Clca3</i>       | Chloride channel calcium activated 3 | 36.5          | 36.8     | NS                                              |
| A_51_P335460     | <i>Scin</i>        | Scinderin                            | 22.4          | 11.4     | NS                                              |
| A_51_P169476     | <i>Mcpt1</i>       | Mast cell protease 1                 | 18.2          | 1.9      | < 0.05                                          |
| A_51_P147987     | <i>Itln</i>        | Intelectin                           | 9.2           | 13.6     | NS                                              |
| A_51_P434567     | <i>Adra2a</i>      | Adrenergic receptor, α2a             | 9.0           | 4.1      | NS                                              |
| A_52_P379474     | ENSMUST00000043170 | Unknown                              | 8.9           | 12.5     | NS                                              |
| A_52_P67493      | <i>Adra2a</i>      | Adrenergic receptor, α2a             | 8.7           | 4.5      | NS                                              |
| A_51_P173114     | <i>Pcdh21</i>      | Protocadherin 21                     | 6.7           | 3.4      | NS                                              |

\* Values represent fold increase with significant (adjusted  $P < 0.01$ ) changes in epithelium from OVA-treated WT mice compared to saline-treated WT mice.

\*\* Values represent fold increase in epithelium from OVA-treated β6 KO mice compared to saline-treated β6 KO mice.
